# Supplementary material for: ATP/P2X7 receptor signaling as a potential anti-inflammatory target of natural polyphenols
Source: PubMed Central journal article supplement (PMC6152980; doi:10.1371/journal.pone.0204229), 2018-09-24
Supplement: pone.0204229.s002.pdf [file pone.0204229.s002.pdf]

**A**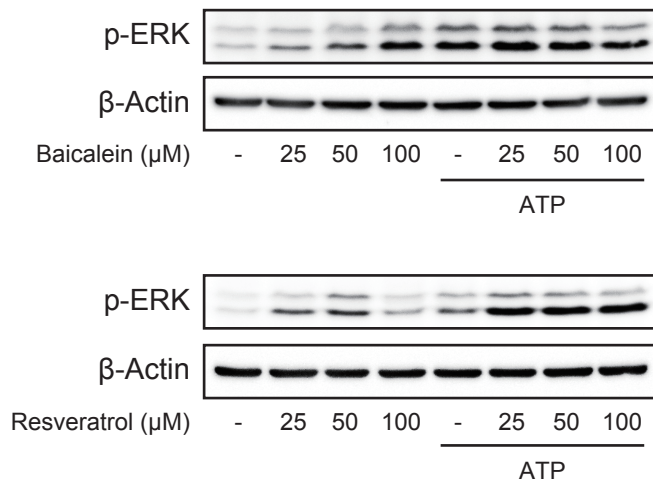**B**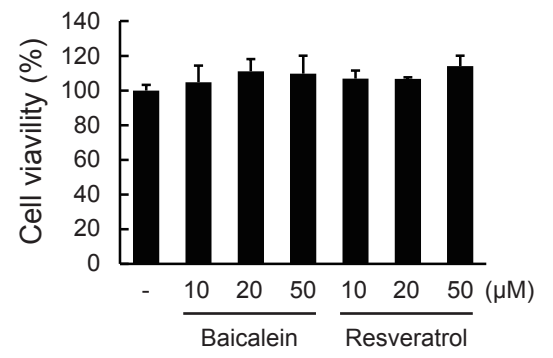**S2 fig.**
