# Supplementary material for: ATP/P2X7 receptor signaling as a potential anti-inflammatory target of natural polyphenols
Source: PubMed Central journal article supplement (PMC6152980; doi:10.1371/journal.pone.0204229), 2018-09-24
Supplement: pone.0204229.s004.pdf [file pone.0204229.s004.pdf]

**S1 Table. Primer sequences used for quantitative RT-PCR**

| <b>Gene</b>   | <b>Primer</b> | <b>Sequence (5' to 3')</b>  |
|---------------|---------------|-----------------------------|
| GAPDH         | forward       | TCAAGCTCATTTCCTGGTAT        |
|               | reverse       | GTCCAGGGTTTCTTACTCCT        |
| iNOS          | forward       | CAGCTGGGCTGTACAAACCTT       |
|               | reverse       | CATTGGAAGTGAAGCGTTTCG       |
| IFN- $\beta$  | forward       | AGCTCCAAGAAAGGACGAACAT      |
|               | reverse       | GCCCTGTAGGTGAGGTTGATCT      |
| TNF- $\alpha$ | forward       | GTGGAAGTGGCAGAAGAGGC        |
|               | reverse       | AGACAGAAGAGCGTGGTGGC        |
| COX-2         | forward       | TTGGGGAGACCATGGTAGAG        |
|               | reverse       | GCTCGGCTTCCAGTATTGAG        |
| IL-6          | forward       | ATCCAGTTGCCTTCTTGGGACTGA    |
|               | reverse       | TAAGCCTCCGACTTGTGAAGTGGT    |
| IL-10         | forward       | AGTTCAGAGCTCCTAAGAGAGTTGTGA |
|               | reverse       | CCTCTGAGCTGCTGCAGGAA        |
| IL-1 $\beta$  | forward       | AAATACCTGTGGCCTTGGGC        |
|               | reverse       | CTTGGGATCCACACTCTCCAG       |
