# Supplementary material for: ATP/P2X7 receptor signaling as a potential anti-inflammatory target of natural polyphenols
Source: PubMed Central journal article supplement (PMC6152980; doi:10.1371/journal.pone.0204229), 2018-09-24
Supplement: pone.0204229.s005.pdf [file pone.0204229.s005.pdf]

**S2 Table. Chemical structures and names of selected polyphenols used in this study**

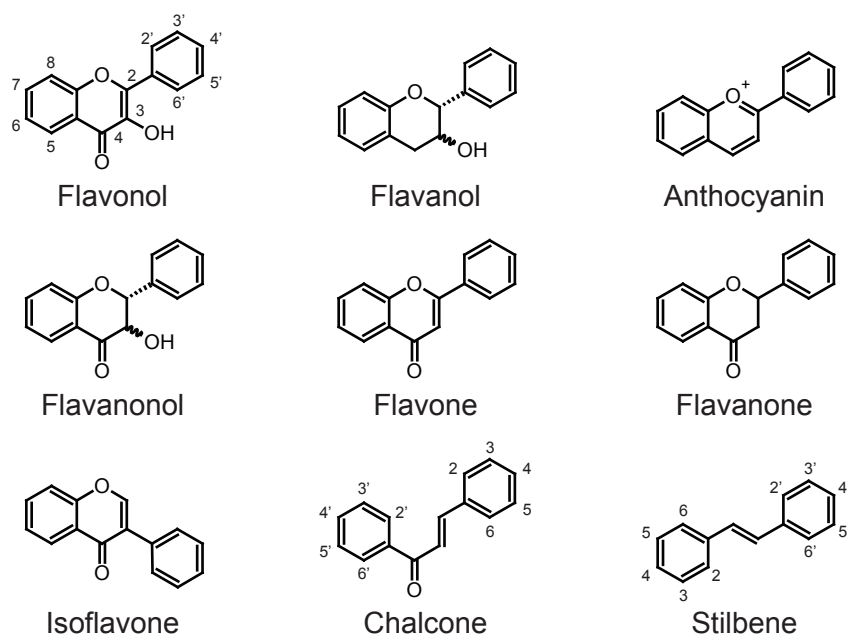

| Class      | Family            | Name                                      | Synonyms                                           |                                       |
|------------|-------------------|-------------------------------------------|----------------------------------------------------|---------------------------------------|
| Flavonoids | Flavonols         | Isorhamnetin                              | 3,4',5,7-Tetrahydroxy-3'-methoxyflavone            |                                       |
|            |                   | Galangin                                  | 3,5,7-Trihydroxyflavone                            |                                       |
|            |                   | Gossypetin                                | 3,3',4',5,7,8-Hexahydroxyflavone                   |                                       |
|            |                   | Tamarixetin                               | 3,3',5,7-Tetrahydroxy-4'-methoxyflavone            |                                       |
|            |                   | Myricetin                                 | 3,3',4',5,5',7-Hexahydroxyflavone                  |                                       |
|            |                   | Kaempferol                                | 3,4',5,7-Tetrahydroxyflavone                       |                                       |
|            |                   | Quercetin                                 | 3,3',4',5,7-Pentahydroxyflavone                    |                                       |
|            |                   | Quercetagenin                             | 3,3',4',5,6,7-Hexahydroxyflavone                   |                                       |
|            |                   | Rhamnetin                                 | 3,3',4',5-Tetrahydroxy-7-methoxyflavone            |                                       |
|            |                   | Flavonol                                  | 3-Hydroxyflavone                                   |                                       |
|            |                   | Morin                                     | 2',3,4',5,7-Pentahydroxyflavone                    |                                       |
|            |                   | Datiscetin                                | 2',3,5,7-Tetrahydroxyflavone                       |                                       |
|            |                   | Fisetin                                   | 3,3',4',7-Tetrahydroxyflavone                      |                                       |
|            | Flavanols         | EC                                        | 3,3',4',5,7-Pentahydroxyflavanone; (-)-Epicatechin |                                       |
|            |                   | ECg                                       | (-)-Epicatechin 3-O-gallate                        |                                       |
|            |                   | EGC                                       | (-)-Epigallocatechin                               |                                       |
|            |                   | EGCg                                      | (-)-Epigallocatechin 3-O-gallate                   |                                       |
|            | Anthocyanins      | Cyanidin                                  | 3,3',4',5,7-Pentahydroxyflavylium                  |                                       |
|            |                   | Cyanidin 3-O-glucoside                    | Kuromanin                                          |                                       |
|            | Flavanonols       | Taxifolin                                 | 3,3',4',5,7-Pentahydroxyflavanone                  |                                       |
|            |                   | Flavones                                  | Flavone                                            | 2-Phenylchromone                      |
|            |                   |                                           | Baicalein                                          | 5,6,7-Trihydroxyflavone               |
|            |                   |                                           | Diosmetin                                          | 3',5,7-Trihydroxy-4'-methoxyflavone   |
|            |                   |                                           | Tricetin                                           | 3',4',5,5',7-Pentahydroxyflavone      |
|            |                   |                                           | Apigenin                                           | 4',5,7-Trihydroxyflavone              |
|            |                   |                                           | Acacetin                                           | 5,7-Dihydroxy-4'-methoxyflavone       |
|            |                   |                                           | Chrysin                                            | 5,7-Dihydroxyflavone                  |
|            |                   |                                           | Luteolin                                           | 3',4',5,7-Tetrahydroxyflavone         |
|            |                   | Flavanones                                | Eriodictyol                                        | 3',4',5,7-Tetrahydroxyflavanone       |
|            |                   |                                           | Hesperetin                                         | 3',5,7-Trihydroxy-4'-methoxyflavanone |
|            |                   |                                           | Naringenin                                         | 4',5,7-Trihydroxyflavanone            |
|            |                   |                                           | Homoeriodictyol                                    | 4',5,7-Trihydroxy-3'-methoxyflavanone |
|            | Isoflavones       | Genistein                                 | 4',5,7-Trihydroxyisoflavone                        |                                       |
| Daidzein   |                   | 4',7-Dihydroxyisoflavone                  |                                                    |                                       |
| Genistin   |                   | 4',5,7-Trihydroxyisoflavone 7-O-glucoside |                                                    |                                       |
| Daidzin    |                   | 4',7-Dihydroxyisoflavone 7-O-glucoside    |                                                    |                                       |
| Chalcones  | Butein            | 2',3,4,4'-Tetrahydroxychalcone            |                                                    |                                       |
|            | Homobutein        | 2',4,4'-Trihydroxy-3-methoxychalcone      |                                                    |                                       |
|            | Isoliquiritigenin | 2',4,4'-Trihydroxychalcone                |                                                    |                                       |
| Stilbenes  | Resveratrol       | 3,4',5-Trihydroxystilbene                 |                                                    |                                       |
|            | Piceid            | Resveratrol 3-O-glucoside                 |                                                    |                                       |
|            | Piceatannol       | 3,3',4,5'-Tetrahydroxystilbene            |                                                    |                                       |
